# Supplementary material for: Highly sensitive fluorescent chemosensor for hypochlorite anion based on a novel irreversible ring-opening strategy
Source: Royal Society of Chemistry journal article supplement (doi:10.1039/c2ay05788c), 2012-01-01
Supplement: c2ay05788c.pdf [file c2ay05788c.pdf]

# Novel Chemosensor for Hypochlorite Anion Based on a Fluorescent Rhodamine 6G Reporter in Water

Fangfang Wei,<sup>a</sup> Yan Lu,<sup>\*a</sup> Song He,<sup>a</sup> Liancheng Zhao<sup>a,b</sup> and Xianshun Zeng<sup>\*a</sup>

<sup>a</sup> School of Materials Science & Engineering, Tianjin University of Technology, Tianjin 300384, China..

<sup>b</sup> School of Materials Science and Engineering, Harbin Institute of Technology, Harbin 150001, China.

## Materials and methods

### 1. Instruments

All solvents and reagents (analytical grade and spectroscopic grade) were obtained commercially and used as received unless otherwise mentioned. NMR spectra were recorded on a Bruker spectrometer at 400 (<sup>1</sup>H NMR) MHz and 100 (<sup>13</sup>C NMR) MHz. Chemical shifts ( $\delta$  values) were reported in ppm down field from internal Me<sub>4</sub>Si (<sup>1</sup>H and <sup>13</sup>C NMR). HRMS spectra were recorded on a Varian QFT-ESI mass spectrometer and a QTOF mass spectrometer. Elemental analyses were performed on a Vanio-EL elemental analyzer (Analysensysteme GmbH, Germany). UV absorption spectra were recorded on a UV-2550 UV-VIS spectrophotometer (Shimadzu, Japan). Fluorescence measurements were performed using an F-4600 fluorescence spectrophotometer (Hitachi, Japan) equipped with a quartz cell (1 cm  $\times$  1 cm). Melting points were recorded on a Boetius Block apparatus and are uncorrected.

### 2. Synthesis of RGPH

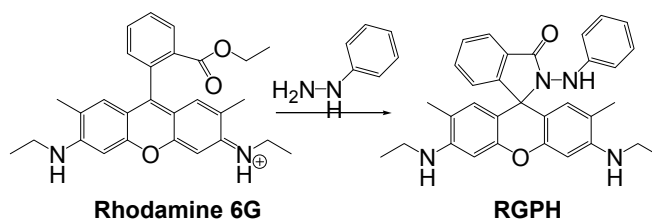

To a 100 mL reactor, was charged rhodamine 6G (0.60 g, 1.2 mmol), phenyl hydrazine (5 mL, 50 mmol) and ethanol (20 mL). The reaction mixture was heated to reflux for 7 h. The solvent was removed under reduced pressure. The residue was dissolved in dichloromethane (50 mL), and washed with saturated NaHCO<sub>3</sub> solution. The organic phase was separated. The water phase was extracted with dichloromethane (30 mL). The

combined organic phase was washed with water (50 mL × 2) and dried over anhydrous MgSO<sub>4</sub>. After filtration, the filtrate was condensed to dryness. The residue was triturated with acetonitrile. The precipitate was collected by filtration, and the solid was washed with acetonitrile (5 mL × 2), dried under vacuum. **RGPH** was obtained as yellow powder in 88% yield; mp. 179-180 °C; HRMS:  $m/z$   $[M + H]^+ = 505.2596$ ; Calcd: 505.2598; <sup>1</sup>H NMR (400 MHz, CDCl<sub>3</sub>, ppm): δ 1.29 (t, 6H,  $J = 7.2$  Hz, NCH<sub>2</sub>CH<sub>3</sub>), 1.92 (s, 6H, CH<sub>3</sub>), 3.17 (m, 4H,  $J = 7.2$  Hz, NCH<sub>2</sub>CH<sub>3</sub>), 5.30 (s, 2H, NHCH<sub>2</sub>), 5.31(s, 1H, NHC<sub>6</sub>H<sub>5</sub>), 6.29 (s, 4H, xanthene-H), 6.49 (d, 2H,  $J = 8.0$  Hz, Ar-H), 6.65 (t, 1H,  $J = 7.2$  Hz, Ar-H), 6.91(t, 2H, Ar-H), 7.17 (d, 1H,  $J = 4.0$  Hz, Ar-H), 7.54-7.62 (m, 2H, Ar-H), 8.02 (d, 1H,  $J = 4.0$  Hz, Ar-H). <sup>13</sup>C NMR (100 MHz, CDCl<sub>3</sub>, ppm): δ 167.2, 152.6, 150.8, 147.2, 147.1, 147.1, 147.8, 133.3, 130.5, 128.8, 128.7, 128.6, 128.4, 128.3, 128.2, 124.5, 123.4, 120.5, 118.1, 114.7, 106.1, 97.3, 66.6, 53.5, 38.7, 16.8, 14.7. Anal. Calcd for C<sub>32</sub>H<sub>32</sub>N<sub>4</sub>O<sub>2</sub>: C, 76.16%; H, 6.39%; N, 11.10%. Found: C, 76.09%; H, 6.36%; N, 10.86%.

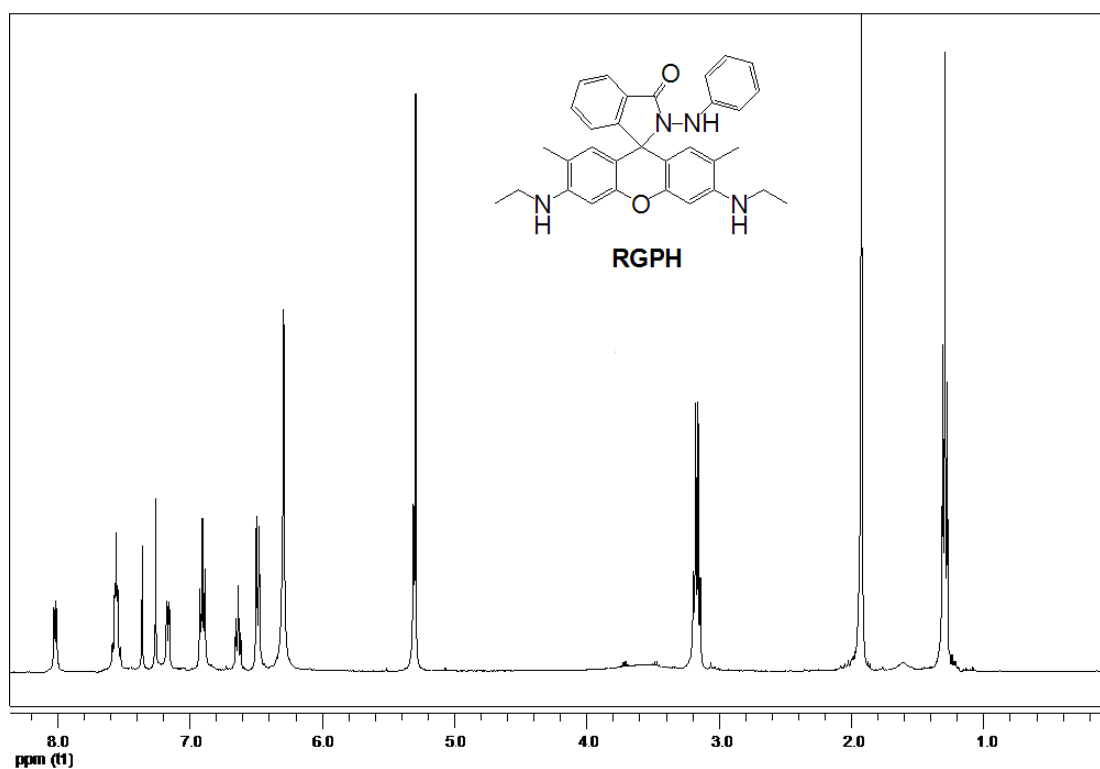

Figure S1. <sup>1</sup>H NMR of **RGPH** (400 MHz, CDCl<sub>3</sub>).

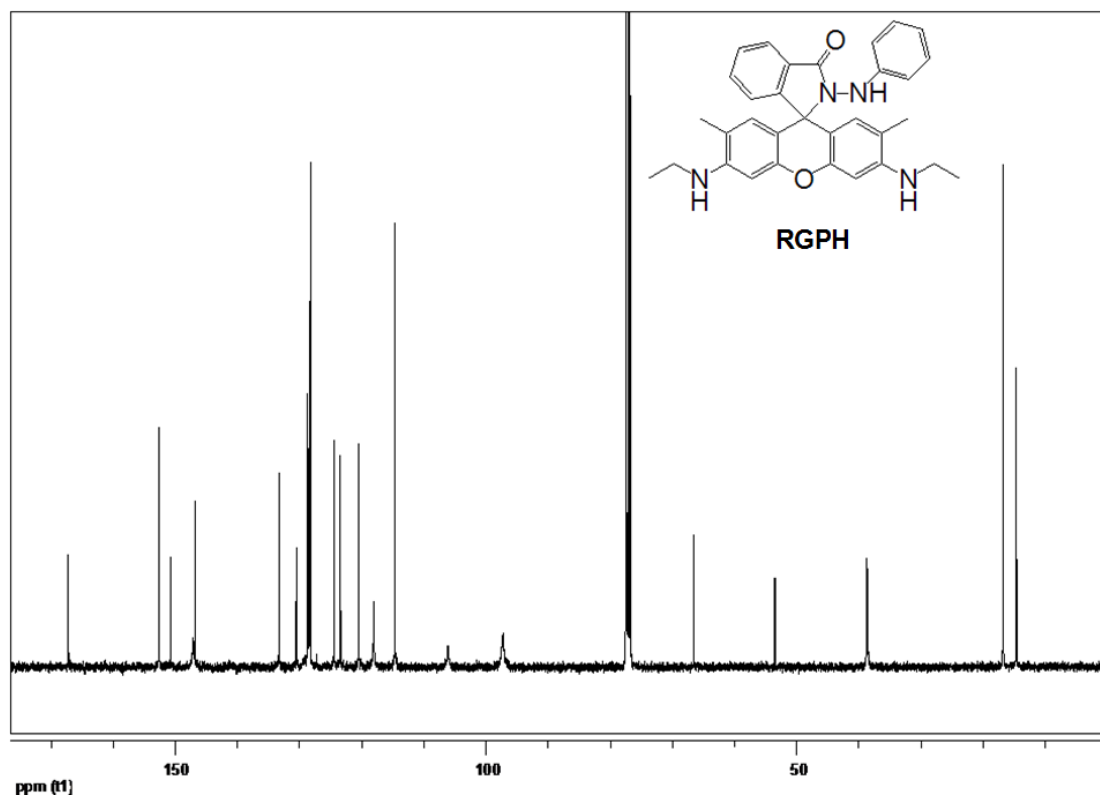

**Figure S2.**  $^{13}\text{C}$  NMR of **RGPH** (100 MHz,  $\text{CDCl}_3$ ).

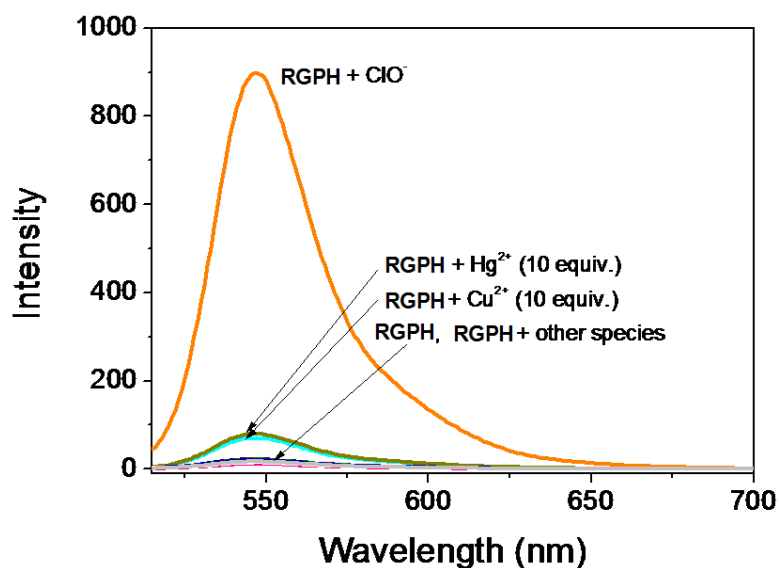

**Figure S3.** Emission spectra of **RGPH** (5  $\mu\text{M}$ ) with addition of sodium salts of  $\text{Cl}^-$ ,  $\text{ClO}_4^-$ ,  $\text{H}_2\text{O}_2$ ,  $\text{NO}_2^-$ ,  $\text{NO}_3^-$  and  $\text{SO}_4^{2-}$  (100 equiv.),  $\text{ClO}^-$  (3.0 equiv.), nitrate salts of  $\text{Ca}^{2+}$ ,  $\text{K}^+$ ,  $\text{Mg}^{2+}$ ,  $\text{Pb}^{2+}$ ,  $\text{Ni}^{2+}$ ,  $\text{Fe}^{3+}$ ,  $\text{Zn}^{2+}$ ,  $\text{Cu}^{2+}$ ,  $\text{Hg}^{2+}$  and TBHP and  $\text{H}_2\text{O}_2$  (10 equiv.) in  $\text{H}_2\text{O}$  with an excitation at 505 nm.

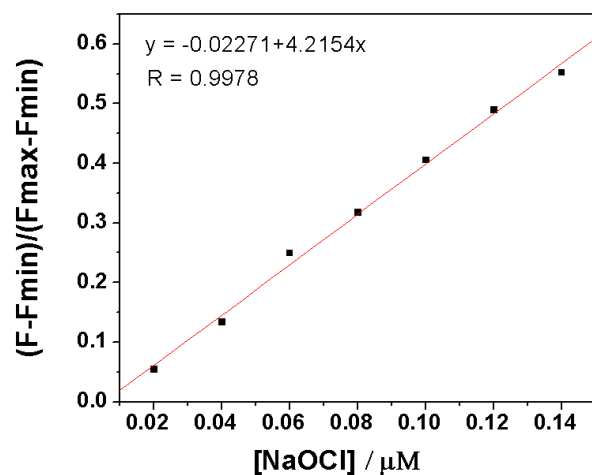

**Figure S4.** Emission (at 547 nm) of **RGPH** at different concentrations of  $\text{ClO}^-$  (0, 0.02, 0.04, 0.06, 0.08, 0.10, 0.12, 0.14  $\mu\text{M}$ ) added, normalized between the minimum emission (0.0  $\mu\text{M}$   $\text{ClO}^-$ ) and the emission at 0.14  $\mu\text{M}$   $\text{ClO}^-$ . The detection limit was estimated to be  $5.0 \times 10^{-9}$  M.

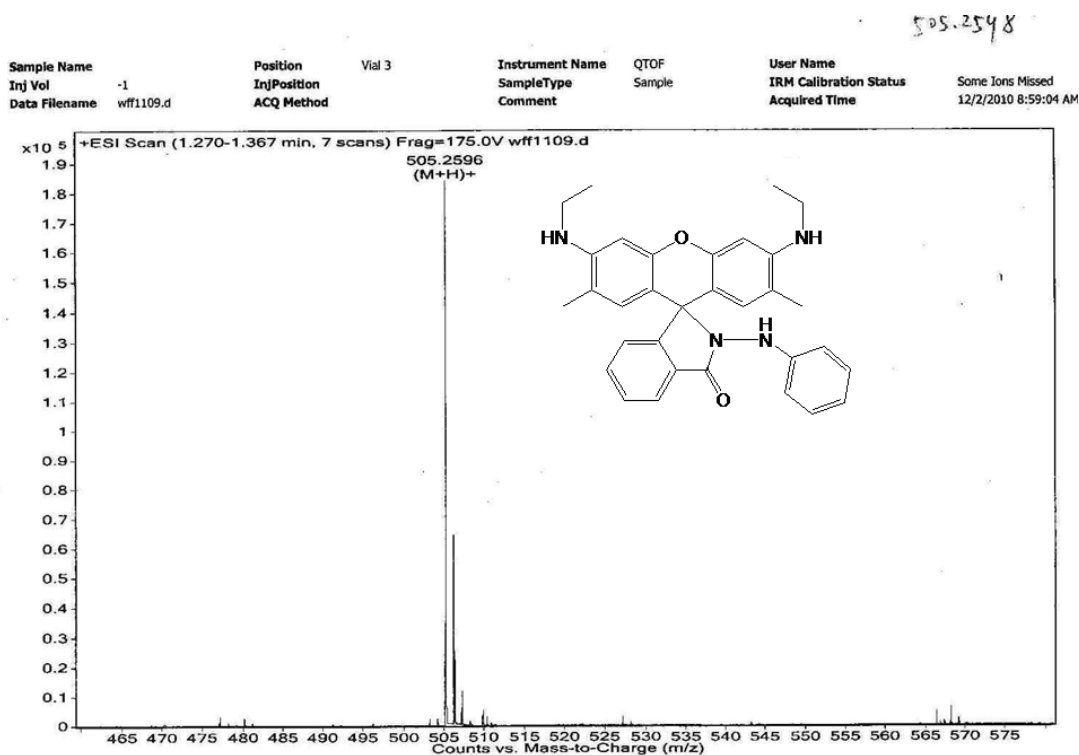

**Figure S5.** HRMS spectra of **RGPH**. The peak ( $m/z$ ) at 505.2596 corresponds to  $[\text{M} + \text{H}]^+$  ion (Calcd: 505.2598).

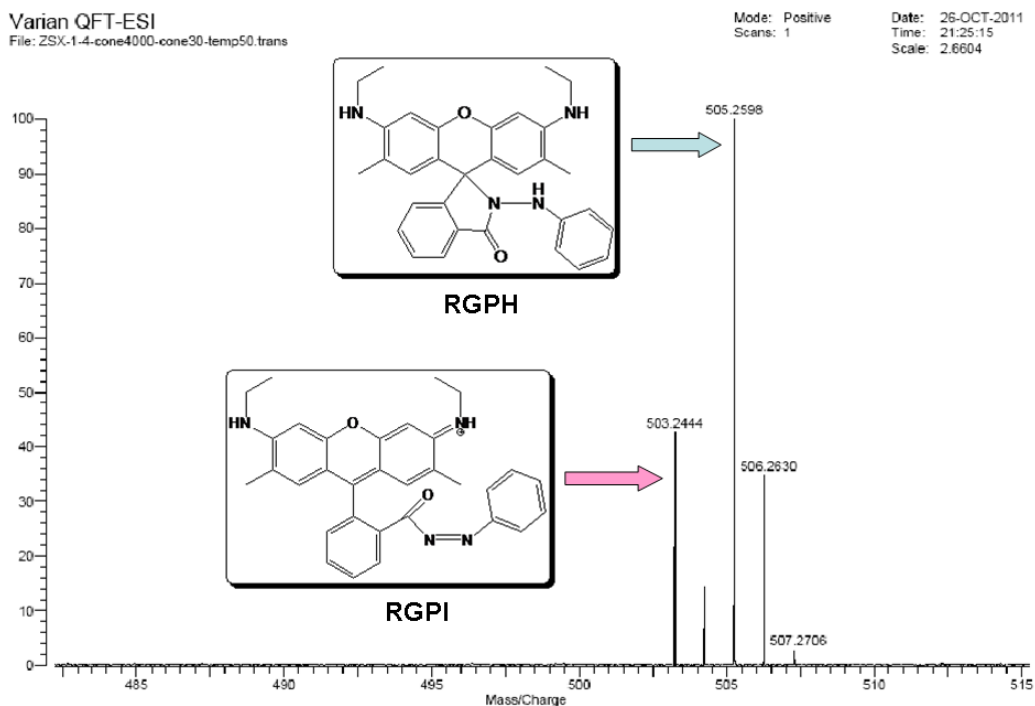

**Figure S6.** HRMS spectra of the reaction mixture of **RGPH** with  $\text{ClO}^-$ . The peak ( $m/z$ ) at 503.2444 corresponds to the oxidized form of  $[\text{RGPI} + \text{H}]^+$  ion (Calcd: 503.2444). The peak ( $m/z$ ) at 505.2598 corresponds to  $[\text{RGPH} + \text{H}]^+$  ion (Calcd: 505.2598).

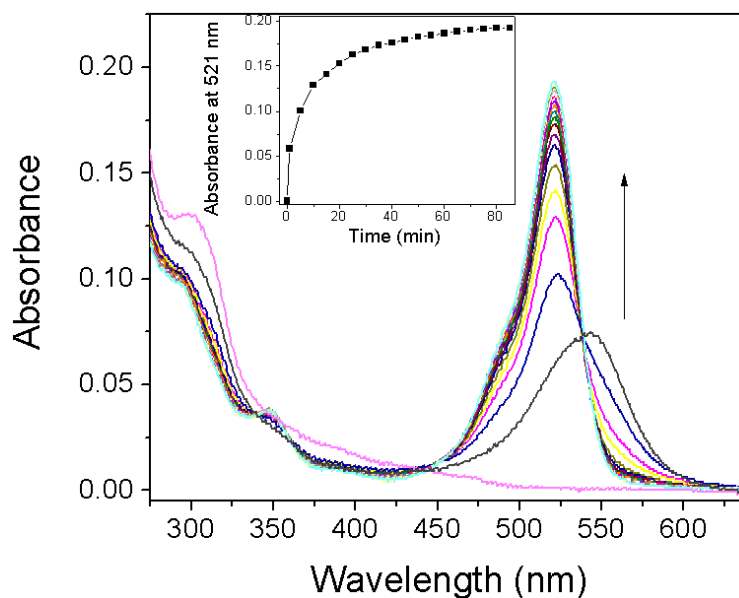

**Figure S7.** Time-dependent absorption spectra of **RGPH** (10  $\mu\text{M}$ ) in the presence of  $\text{ClO}^-$  (3.0 equiv) in  $\text{H}_2\text{O}$  at 25  $^\circ\text{C}$ . Inset: absorbance at 521 nm at 0, 1, 5, 10, 15, 20, 25, 30, 35, 40, 45, 50, 55, 60, 65, 70, 75, 80, 85 min.

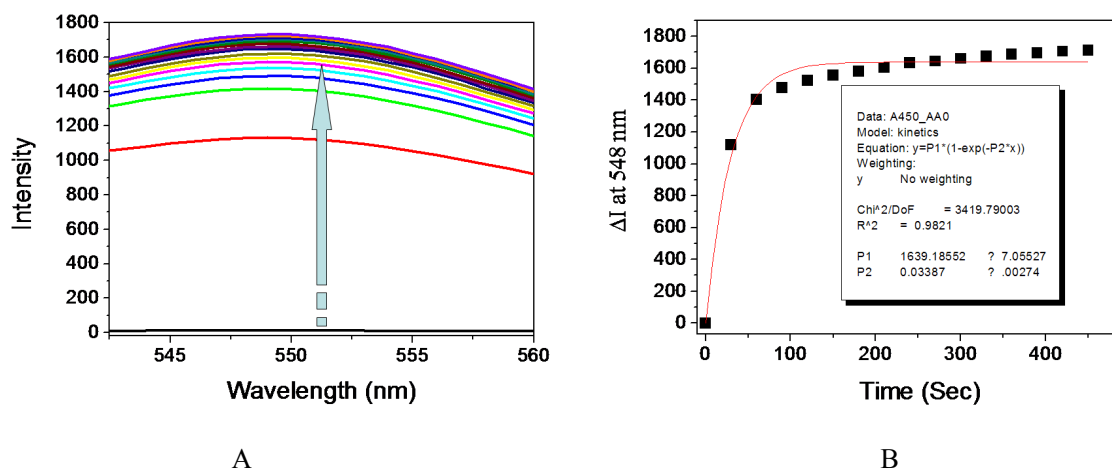

**Figure S8.** The reaction kinetic measurements of **RGPH** with  $\text{ClO}^-$  under pseudo-first-order conditions by fluorescence spectra. A) Time-dependent changes in the fluorescence spectra and B) fluorescent intensity at  $\lambda = 548$  nm observed from the reaction between **RGPH** ( $5.0 \mu\text{M}$ ) and  $\text{ClO}^-$  ( $600 \mu\text{M}$ ) in  $\text{H}_2\text{O}$  at  $T = 298$  K. The gray curve overlaid on the experimental data points is theoretical fit generated using  $k_{obs} = 3.387 \times 10^{-2} \text{ s}^{-1}$ .

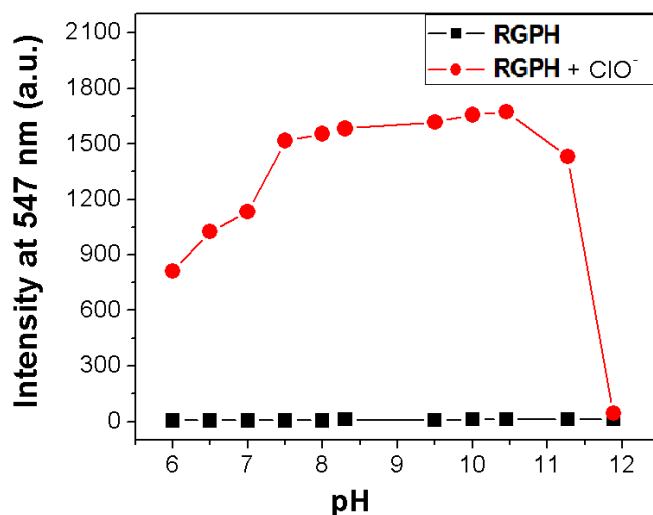

**Figure S9.** Profile of pH dependence of the fluorescence intensity of **RGPH** ( $5 \mu\text{M}$ ) at 547 nm in the absence and presence of  $\text{ClO}^-$  (3.0 equiv.) in  $\text{H}_2\text{O}$ .

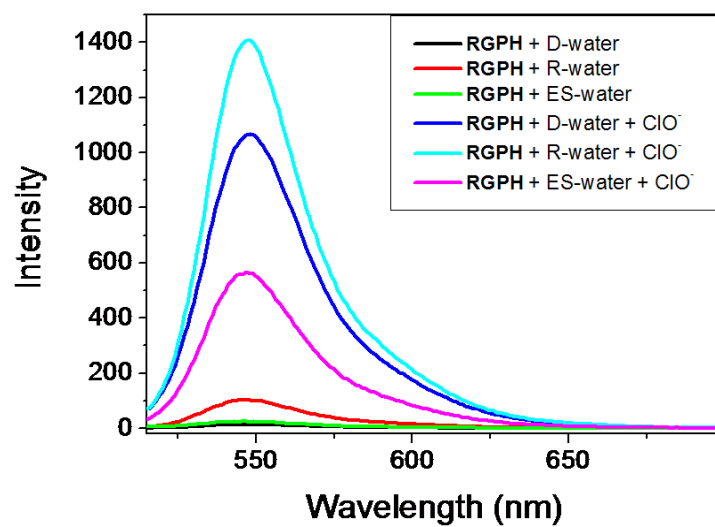

**Figure S10.** Response of **RGPH** (5 μM) in the absence and in the presence of ClO<sup>-</sup> (3 equiv.) in natural water samples.
